# Supplementary material
Source: PubMed Central journal article supplement (PMC4478946)
Supplement: jn.114.207043_nutrition207043SupplementaryData1.pdf [file jn.114.207043_nutrition207043SupplementaryData1.pdf]

Online Supporting Material  
Supplemental Figure 1

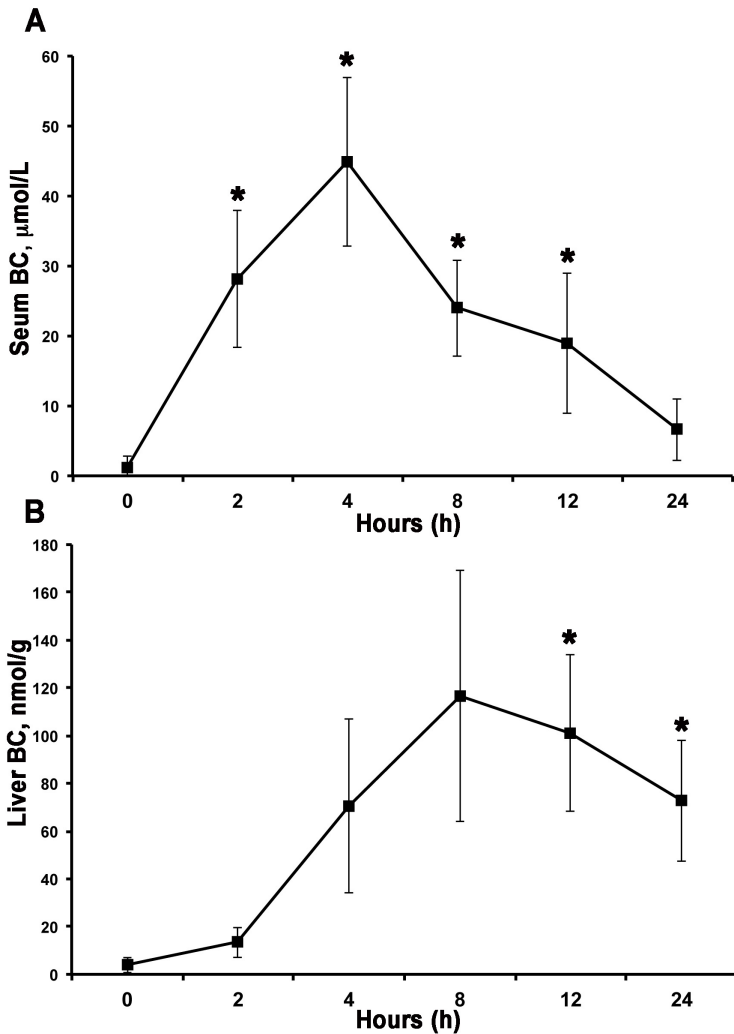

**Serum and liver  $\beta$ -carotene concentrations over the course of 24 hours from a single administration of  $\beta$ -carotene by intraperitoneal (IP) injection to mice.** Three month old wild-type female mice (C57/Bl6 x 129/Sv genetic background), maintained on a regular chow diet, were administered a single dose of  $\beta$ -carotene by IP injection (0 h) and killed at different times post-IP (2, 4, 8, 12 and 24 h) to collect various tissues of the body, including serum (**A**) and liver (**B**).  $\beta$ -carotene concentration was measured by HPLC analysis.  $n = 3-4$  mice/time point. Data are means  $\pm$  SD. Statistical analysis by Students'  $t$ -test. \*different from 0 h time point,  $P < 0.05$ . For liver,  $P = 0.09$  at 4 h, and  $P = 0.06$  at 8 h. BC,  $\beta$ -carotene.
